# Supplementary material for: Mechanism and activity of the oxygen reduction reaction on WTe2 transition metal dichalcogenide with Te vacancy
Source: Royal Society of Chemistry journal article supplement (doi:10.1039/c9ra09809g), 2020-01-01
Supplement: c9ra09809g1.pdf [file c9ra09809g1.pdf]

## Electronic Supplementary Information

### **Mechanism and activity of oxygen reduction reaction on $WTe_2$ transition metal dichalcogenide with Te vacancy**

*O My Na<sup>1,2</sup>, Nguyen Thi Xuan Huynh<sup>1,2,3</sup>, Pham Tan Thi<sup>1,2</sup>, Viorel Chihaiia<sup>4</sup>, Do Ngoc Son<sup>1,2,\*</sup>*

<sup>1</sup> Ho Chi Minh City University of Technology (HCMUT), Ho Chi Minh City, Vietnam

<sup>2</sup> Vietnam National University, Ho Chi Minh City, Vietnam

<sup>3</sup> Quy Nhon University, Binh Dinh Province, Vietnam

<sup>4</sup> Institute of Physical Chemistry “Ilie Murgulescu” of the Romanian Academy, Splaiul Independentei 202, Sector 6, 060021 Bucharest, Romania

\* Corresponding author: [dnson@hcmut.edu.vn](mailto:dnson@hcmut.edu.vn), <https://orcid.org/0000-0001-9414-9727> (ORCID)

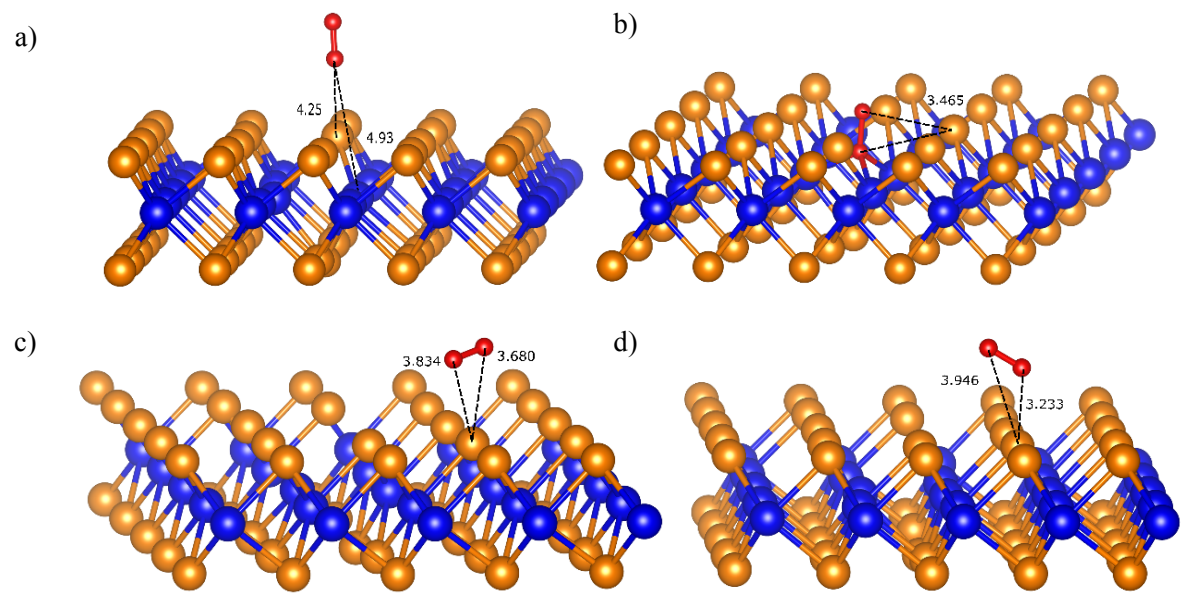

**Figure S1.** The favorable structures of the molecular oxygen adsorption on  $WTe_2^d$ : D3 in region I (a), D4 in region II (b), P2 in region III (c), and P3 in region III (d). Where the name of each configuration is enclosed with letter D and P for defect and perfect regions, respectively. The color spheres: W – blue, Te – orange, and O – red.
